## **“Maternal Morbidity and Medically Assisted Reproduction Treatment Types: Evidence from the Utah Population Database”**

**Alina Pelikh\*<sup>1</sup> PhD, Ken R. Smith<sup>2</sup> PhD, Mikko Myrskylä<sup>3,4,5</sup> PhD, Michelle P Debbink<sup>6</sup> MD, PhD,  
Alice Goisis<sup>1</sup> PhD**

<sup>1</sup>Centre for Longitudinal Studies, Social Research Institute, University College London, 55-59 Gordon Square, London WC1E 6BT, United Kingdom; <sup>2</sup>Population Science, Huntsman Cancer Institute and Department of Family and Consumer Studies, University of Utah, 2000 Cir of Hope Dr #1950, Salt Lake City 84112, USA; <sup>3</sup>Max Planck Institute for Demographic Research, Konrad-Zuse-Straße 1, Rostock 18057, Germany; <sup>4</sup>Helsinki Institute for Demography and Population Health, University of Helsinki, Yliopistonkatu 3, Helsinki 00014, Finland; <sup>5</sup>Max Planck – University of Helsinki Center for Social Inequalities in Population Health, Rostock, Germany and Helsinki, Finland; <sup>6</sup>Department of Obstetrics and Gynecology and Spencer Fox Eccles School of Medicine, University of Utah, 50 N Medical Dr., Salt Lake City 84103, USA

\*Alina Pelikh is the corresponding author; [a.pelikh@ucl.ac.uk](mailto:a.pelikh@ucl.ac.uk); <https://orcid.org/0000-0002-1359-1749>

### **Abstract**

**Study question:** How are Medically Assisted Reproduction (MAR) treatments (Fertility enhancing drugs (FED), artificial/intrauterine insemination (AI/IUI)), assisted reproductive technology (ART) with autologous/donor oocytes) associated with maternal morbidity (MM)?

**Summary answer:** More invasive MAR treatments (ART and AI/IUI) are associated with higher risk of MM, whilst less invasive treatments are not; this relationship is partially explained by higher prevalence of multifetal gestation and obstetric comorbidities in women undergoing more invasive treatment, but the persistent association suggests subfertility itself may contribute to maternal morbidity risk.

**What is known already:** Women conceiving through MAR are at higher risk of MM, however, reported risks vary depending on the measurement of MM and data available on confounding.

**Study design, size, duration:** Birth certificates were used to study maternal morbidity among all women giving birth in Utah, U.S., between 2009 and 2017 (N=460,976 deliveries); 19,448 conceived

**NOTE:** This preprint reports new research that has not been certified by peer review and should not be used to guide clinical practice.

through MAR (4.2%). The MM outcome measure included the presence of any of the following: blood transfusion; unplanned operating room procedure; admission to ICU; eclampsia; unplanned hysterectomy; ruptured uterus.

**Participants/materials, setting, methods:** Logistic regressions were estimated for the binary outcome (presence of any of the MM conditions). We assessed MM among women conceiving through MAR (overall and by type of treatment) compared to those conceiving spontaneously in the overall sample before and after adjustment for maternal socio-demographic characteristics (maternal age, family structure, level of education, Hispanic origin, parity), pre-existing maternal comorbidities (i.e., chronic hypertension, heart disease, asthma), multifetal gestation, and obstetric comorbidities (i.e., placenta previa, placental abruption, preterm delivery, cesarean delivery).

**Main results and the role of chance:** Women conceiving through MAR had higher risk of MM; however, the magnitude of the association differed depending on the type of treatment. In the unadjusted models, more invasive treatments were associated with higher odds of MM: OR 5.71 (95% CI 3.50–9.31) among women conceiving through ART with donor oocytes, OR 3.20 (95% CI 2.69–3.81) among women conceiving through ART with autologous oocytes, and OR 1.85 (95% CI 1.39–2.46) among women conceiving through AI/IUI, whereas women conceiving through FED had similar risks of MM to compared to women conceiving spontaneously (SC), OR 1.09 (95% CI 0.91–1.30). The associations between MAR and MM were largely attenuated once multifetal gestation was accounted for. After controlling for obstetric comorbidities, the associations were further attenuated, yet the coefficients remained higher among women conceiving through ART with either donor oocytes OR 1.70 (95% CI 0.95–3.04) or autologous oocytes OR 1.46 (95% CI 1.20–1.78) compared to women conceiving spontaneously. In analyses limited to singleton pregnancies, the differences in MM between women conceiving through MAR and SC were smaller in the unadjusted models. Nevertheless, women conceiving through more invasive treatments exhibited higher risk of MM. After adjusting for obstetric comorbidities, the coefficients were further attenuated and statistically insignificant for all types of treatments.

**Limitations, reasons for caution:** The data do not allow us to separate the confounding effects of subfertility on maternal morbidity from those of MAR treatments per se as there is no information on the history of previous infertility treatments or length of trying to become pregnant prior to conception. Our data also do not permit us to distinguish among different ART treatment approaches that could change certain risks (e.g. fresh or frozen embryo transfer, intracytoplasmic sperm injection, or preimplantation genetic screening via blastocyst sampling).

**Wider implications of the findings:** Our findings showing that more invasive MAR treatments are associated with higher MM suggest that subfertility could be an important unobserved factor in MM risk as it could be associated with both higher risk of MM and with undergoing more invasive procedures. Though the odds of MM were generally lower or non-significant after accounting for multifetal gestation, there remain important clinical implications because a high proportion of individuals undergoing MAR in Utah have multiple births. Therefore, the association between MAR, multifetal gestation, and MM may play a role in counselling and patient and clinician choice of MAR therapies.

**Study funding/competing interest(s):** This work was supported by European Research Council agreement n. 803958 (to A.G.). Authors have no conflict of interest to declare. MM was supported by the Strategic Research Council (SRC), FLUX consortium, decision numbers 345130 and 345131; by the National Institute on Aging (R01AG075208); by grants to the Max Planck – University of Helsinki Center from the Max Planck Society (Decision number 5714240218), Jane and Aatos Erkkö Foundation, Faculty of Social Sciences at the University of Helsinki, and Cities of Helsinki, Vantaa and Espoo; and the European Union (ERC Synergy, BIOSFER, 101071773). Views and opinions expressed are, however, those of the author only and do not necessarily reflect those of the European Union or the European Research Council. Neither the European Union nor the granting authority can be held responsible for them. We thank the Pedigree and Population Resource of Huntsman Cancer Institute, University of Utah (funded in part by the Huntsman Cancer Foundation) for its role in the ongoing collection, maintenance and support of the Utah Population Database (UPDB). We also acknowledge partial

support for the UPDB through grant P30 CA2014 from the National Cancer Institute, University of Utah and from the University of Utah's program in Personalized Health and Utah Clinical and Translational Science Institute. MPD receives salary support from the March of Dimes and the American Board of Obstetrics and Gynecology as part of the Reproductive Scientist Development Program, as well as NICHD 1U54HD113169 and NIMHD 1R21MD019175-01A1.

**Trial registration number:** not applicable

**Key words:** assisted reproductive technology; artificial insemination; ovulation induction; maternal morbidity; obstetric comorbidities

## Introduction

With the increasing number of people undergoing Medically Assisted Reproduction (MAR) to treat infertility worldwide, understanding the health of children and women who conceived through MAR remains crucial. The existing literature has largely focused on the well-being of children born after MAR and established that while children conceived through MAR are more likely to have adverse perinatal outcomes (such as low birth weight or prematurity), it is likely that these are caused by maternal subfertility and high proportion of multiple births, rather than by the treatments themselves (McDonald et al. 2005; Sutcliffe and Ludwig 2007; Pandey et al. 2012; Pinborg et al. 2013; Luke et al., 2017; Berntsen et al., 2019; Goisis et al., 2019; Pelikh et al., 2022). Less attention has been given to examining the association between fertility treatments and maternal morbidity (MM), with studies showing mixed findings. Some studies show an overall increased risk of MM among women conceiving through MAR, while others report elevated risk only among specific high-risk subgroups such as women with multiple births or women with pre-existing health conditions (Belanoff et al., 2016, Wang et al., 2016; Martin et al., 2016; Dayan et al., 2019; Luke et al., 2019; Nagata et al., 2019; Korb et al., 2020; Sabr et al., 2022). As the drivers underlying these associations are complex, interconnected, and tied to multiple factors including maternal subfertility and pre-existing comorbidities, socio-demographic characteristics and obstetric complications (Lazariu et al., 2017; Kilpatrick et al., 2016; Hirshberg and Srinivas, 2017; Leonard et al., 2019; Grobman et al., 2014), it remains unclear whether MAR treatment itself poses risks for MM.

Moreover, the use of specific MAR procedures often depends on the duration of infertility and underlying infertility diagnoses along with treatment availability and cost (Henne and Bundorf, 2008; Bitler and Schmidt, 2012; Hamilton and McManus, 2012). Specifically, there is often a stepwise progression from less invasive to more invasive measures when less invasive measures do not result in ongoing pregnancy after some period of time. Due to the limited availability of large-scale data providing details on both MAR treatments and MM, only a few studies have been able to investigate whether MM differs by types of MAR treatment (Wang et al., 2016; Dayan et al., 2019; Nagata et al.,

2019; Korb et al., 2020). These studies report higher MM risks among women conceiving through more invasive treatments (i.e., IVF or ICSI) compared to women who conceive spontaneously. However, the magnitude of the effects differs substantively depending on the type of the MM outcome and data employed, and findings on the effects of less invasive treatments (i.e., ovulation induction or intrauterine insemination (IUI)) are mixed. This literature calls for more evidence to better understand the underlying drivers behind the association between MM and MAR. Such knowledge is crucial both for the provision and choice of treatments recommended by practitioners alongside the efforts to mitigate maternal health risks in the context of persistently high MM prevalence in the US and increasing proportion of women undergoing MAR (Tierney and Guzzo, 2023).

In this paper, we compared MM among women conceiving spontaneously and through MAR in Utah using birth certificates during the period 2009-2017. Utah has one of the highest proportion of children born through MAR of all US states - around 5% (Stanford et al., 2018, Pelikh et al., 2022) – which is comparable to some of the Nordic countries (i.e., Finland and Sweden, Wyns et al., 2021). Because birth certificate records cover all births in Utah and therefore contain a high number of women conceiving through MAR, we can investigate MM with more accuracy compared to small samples from survey data or from an individual clinic.

This study makes two key contributions. First, we analysed MM among women conceiving spontaneously and through MAR with a specific emphasis on exploring whether this association varied according to the type of treatment distinguishing between fertility enhancing drugs (FED), artificial or intrauterine Insemination (AI/IUI), and Assisted Reproductive Technology (ART) with autologous or donor oocytes. Second, we compared risks of MM among women conceiving spontaneously and through MAR before and after adjustment for a wide range of pregnancy and maternal characteristics which might confound the association between MM and MAR, such as maternal pre-existing comorbidities, socio-demographic characteristics, and for multifetal gestation and obstetric comorbidities, which might act as mediators.

## **Materials and methods**

### **Data**

This study used population-based data from the Utah Population Database (UPDB; Smith et al., 2022), which contains information from all Utah birth certificates. This study was approved by the Institutional Review Boards of the University of Utah and by the Utah Resource for Genetic and Epidemiologic Research, an administrative board overseeing access to the UPDB. The STROBE (Strengthening the Reporting of Observational Studies in Epidemiology) guidelines for cross-sectional studies were followed. Since 2009, Utah birth certificates have documented details about infertility treatments used to conceive. Through this information, we identified children conceived via specific MAR treatments – FED, AI or IUI, and ART with own and donor eggs (including donor embryos). We considered women reporting other treatments such as progesterone, metformin, and surgery for endometriosis as spontaneous conception (n=1,982), unless they also disclosed using one of the MAR procedures (n=5,134). At the time this study started, UPDB had received the birth certificate data up to 2017, marking the end of our study period.

### **Study Population**

The birth certificate data contain records for 469,919 deliveries registered in Utah. We excluded deliveries with missing birth order (n=247) and children born to gestational carriers (n=242). We also excluded quadruplets and quintuplets births (n=37). Further information on exclusions and missing data can be found in Figure 1. For twins and triplets, we considered one observation per delivery and controlled for multifetal gestation status. The final sample comprised 460,976 deliveries, of which 19,448 (4.2%) were conceived through MAR treatments.

### **Maternal morbidity**

To define maternal morbidity (MM) we used all available information registered on the birth certificate under maternal morbidities: blood transfusion; unplanned operating room procedure;

admission to ICU; eclampsia; unplanned hysterectomy; ruptured uterus. Though included under the maternal morbidities heading on the birth record, we did not include 3<sup>rd</sup> or 4<sup>th</sup> degree perineal lacerations in our definition of MM, as these are not included in other currently accepted and validated definitions (Main et al., 2016; Snowden et al., 2021). MM was coded as a binary variable, present if any of the above events occurred. Table 1 summarises the rates of MM by mode of conception and type of MAR treatment. Given the concerns on the accuracy of blood transfusion reporting and thresholds for consideration of severity of transfusion (number of units) (Geller et al, 2004; Main et al., 2016), we performed additional sensitivity analyses excluding transfusion from the MM composite.

[Figure 1 insert here]

### **Control variables**

We considered three sets of control variables (all coded as categorical variables). The first set of factors consisted of maternal socio-demographic characteristics: maternal age (15-24; 25-29; 30-34; 35-39; 40+), marital status, the mother's level of education (below university degree; university degree and above) and parity (first or higher-order birth). We did not include maternal race due to the very low proportion of Black, Asian, Pacific Islander and Native American women who conceived through medically assisted reproduction in Utah (i.e. <10 women per some race groups by treatment type), but we did include maternal Hispanic origin. Collectively, these characteristics could confound the association between MM and MAR (Creanga et al., 2014; Shen et al., 2005; Cabacungan et al., 2011; Berger et al., 2023).

The next set of factors was related to maternal health conditions and pre-existing comorbidities which could be associated with MM and with experiencing subfertility (Lazariu et al., 2017; Kilpatrick et al., 2016; Hirshberg and Srinivas, 2017; Leonard et al., 2019; Grobman et al., 2014). We incorporated data on asthma severity (severe and mild), chronic renal disease, chronic hypertension, heart disease severity (severe and mild), insulin-dependent diabetes, and major mental health disorder (anxiety,



depression, bipolar). We could not use data on substance use, schizophrenia, rheumatic disease (rheumatoid arthritis, lupus, Sjogren's syndrome), and non-insulin dependent diabetes available on the birth certificate due to the very low prevalence of these conditions among women conceiving via MAR. We included mother's pre-pregnancy BMI (underweight (<18.5), healthy weight (18.5-24.9), overweight (25.0-29.9), obese ( $\geq 30$ )) given the demonstrated impact on both pregnancy complications and subsequent maternal health, particularly among women undergoing MAR (Dayan et al., 2015; 2018). We also accounted for maternal smoking prior to pregnancy as it is a risk factor for adverse maternal health and pregnancy outcomes (Walsh, 1994, Pollack et al., 2000). Additionally, we accounted for whether women had a history of prior caesarean deliveries, as it can influence subsequent mode of delivery and risk of MM (Clark et al., 2008; Leonard et al., 2019; Chaillet et al., 2024). We also accounted for multifetal gestation which is a common risk factor for MM (Wen et al., 2004; Luke and Brown, 2007; Gray et al., 2012; Witteveen et al., 2016).

The last group of factors was linked to obstetric comorbidities which could be related to some underlying health conditions (including subfertility) and appear to be more common among MAR conceptions but could also develop in any pregnancy posing increased risks for MM (Lazariu et al., 2017; Kilpatrick et al., 2016; Grobman et al., 2014; Hirshberg and Srinivas, 2017). Birth certificates contain information on the following conditions: placenta previa, placental abruption, preterm delivery, HELLP syndrome, pregnancy-induced hypertension, gestational diabetes, pyelonephritis, clinical chorioamnionitis, and delivery mode (cesarean delivery). Data on pyelonephritis was not included due to the very low prevalence among women conceiving via MAR. Information on haemorrhage was not included in the analysis as this condition is closely linked to blood transfusion (Lazariu et al., 2017; Kilpatrick et al., 2016; Grobman et al., 2014).

## Statistical analysis

We estimated four multivariate logistic regression models for MM. Model 1 (the baseline model) presents the unadjusted association between MAR and MM. Model 2 introduces controls for maternal socio-demographic characteristics, birth order, and pre-existing maternal comorbidities. Model 3 further includes multifetal gestation. Model 4 adds controls for obstetric comorbidities. Each model specification was estimated for all women conceiving through MAR and then differentiating by type of MAR treatment. We used clustered standard errors to account for multiple observations per woman (63.3% had one child only in the period 2009-2017).

We first compared the prevalence of MM in women conceiving via MAR to women who conceived spontaneously in the overall sample. We then restricted the analysis to singletons only to examine the associations between MM and MAR whilst removing the effects of multifetal gestation. Additionally, we estimated models which included an interaction between mode of conception and maternal pre-existing health conditions to explore whether they moderate the association between MAR and MM.

## Results

Women who conceived with FED were the largest group among all women who used MAR to conceive (n=11,743; 60.4%, Figure 1), followed by women who conceived through ART using autologous oocytes – 23.5% (n=4,581), AI or IUI – 14.4% (n=2,798), and women who conceived through ART using donor oocytes – 1.7% (n=326). Table 1 shows rates of all MM per 10,000 births, by mode of conception and type of treatments (absolute numbers are presented in Supplementary Table S1). Conditions are not mutually exclusive, therefore the total number of births with at least one condition is smaller than the sum of individual conditions. Blood transfusion was the most common MM condition reported on birth certificates (69 per 10,000 births), followed by unplanned operating room procedure and admission to ICU (18 and 12 per 10,000, respectively). Rates of the MM composite were higher among women who conceived through MAR compared to women who conceived spontaneously (167 vs 95 per 10,000 MAR or SC births, respectively). Among women who conceived through MAR, MM differed

according to the level of treatment invasiveness with rates being the highest among women who conceived through ART (almost twice as high if donor oocytes were used – 521 vs 299 per 10,000 deliveries) and the lowest among women who conceived through FED (104 per 10,000 births).

[Table 1 insert here]

The socio-demographic and health characteristics of women who conceived through MAR differed from those who conceived spontaneously (Table 2). Women who conceived through MAR were, on average, two and a half years older at the time of birth, more likely to have a degree, more likely to be married, and less likely to be of Hispanic origin. MAR children were more likely to be first-borns and multiple births (twins and triplets). Women who conceived through MAR were also more likely to experience chronic hypertension and obesity, but less likely to be smoking prior to pregnancy. The prevalence of the rest of the pre-existing comorbidities was quite similar among births to individuals using MAR or conceiving spontaneously (with some exceptions, e.g., the proportion of women with asthma and major mental health disorders was higher among women conceiving through ART with donor oocytes). Women who conceived through MAR had higher prevalence of obstetric comorbidities regardless of the type of treatments compared to women who conceived spontaneously.

[Table 2 insert here]

Table 3 shows MAR coefficients for maternal morbidity obtained by running an unadjusted model (Model 1), after adjusting for maternal socio-demographic characteristics and pre-existing comorbidities (Model 2), multifetal gestation (Model 3) and obstetric comorbidities (Model 4). The coefficients for the control variables included in Model 2-4 are presented in Supplementary Table S2 (all births) and Supplementary Table S3 (singleton births). In Model 1, on average, women conceiving through MAR had higher odds of MM (1.76 (95% CI 1.57–1.98)), but the association varied by the type of treatment. More invasive treatments (ART and AI/IUI) were, on average, associated with worse MM outcomes, while no differences were observed between women conceiving through FED compared to

women conceiving spontaneously. In the unadjusted models, women conceiving through ART faced the highest odds of maternal morbidity - OR 5.71 (95% CI 3.50–9.31) and OR 3.20 (95% CI 3.50–9.31) among women conceiving with donor and autologous oocytes, respectively.

After adjustment for maternal socio-demographic characteristics and pre-existing comorbidities (Model 2) the relationship between MAR and MM remained significant – OR 1.63 (95% CI 1.45–1.84). Maternal age and parity were both significantly associated with MM after being added in Model 2 and remained so even after inclusion of multifetal gestation and obstetric complications. Further adjustment for multifetal gestation (Model 3) was associated with a greater reduction in OR, yet the MM risks among women who conceived through MAR remained higher compared to women conceiving spontaneously, except for women who conceived through FED. High rates of multifetal gestation in ART contributed significantly to the MAR-MM association, with ORs attenuated to OR 2.46 (95% CI 1.44–4.22) for donor oocytes and OR 1.77 (95% CI 1.46–2.15) for autologous oocytes. These OR translate to 0.68 and 1.29 percentage points higher MM probability compared to spontaneous conception (predicted probability 0.0090 (95% CI 0.0087–0.0093)) (Table 4). Finally, after accounting for obstetric comorbidities (Model 4), the differences in odds of MM were further attenuated yet remained higher among women conceiving through ART with both donor oocytes OR 1.70 (95% CI 0.95–3.04) and autologous oocytes OR 1.46 (95% CI 1.20–1.78) compared to women conceiving spontaneously.

In the models including only singletons, the likelihood of MM was lower in the adjusted models with all women conceiving through MAR (1.28 (95% CI 1.11–1.48) as well as among each MAR treatment type compared to women conceiving spontaneously. Similar to the results using the full sample, the associations differed by the type of treatments, with women conceiving through more invasive treatments exhibiting higher risk of MM. The association between MAR and MM was largely attenuated after controlling for obstetric comorbidities; the odds of MM remained higher than the reference group (except for women conceiving through FED) but were not statistically significant.

[Table 3 insert here]

[Table 4 insert here]

To investigate the moderating role of pre-existing comorbidities in the association between MAR and MM, we conducted the analyses including an interaction term between mode of conception and pre-existing health conditions (Table 5 and Supplementary Table S4). Due to the lower prevalence of MM by type of MAR treatment in the subgroups, we could only investigate the risks in the largest two groups – women conceiving through FED or through ART with autologous oocytes. In Model 1 (unadjusted), women with pre-existing comorbidities who conceived spontaneously and through MAR showed higher MM risk compared to their counterparts without pre-existing comorbidities. However, women who conceived through MAR without pre-existing comorbidities showed higher risk of MM compared to women who conceived spontaneously who had pre-existing comorbidities. A similar pattern is observed when we compared women who conceived through ART with and without pre-existing comorbidities. Adjustment for covariates in Models 2-4 attenuated but did not fully explain the group differences – women conceiving through ART with autologous oocytes were at a higher risk of MM regardless of the pre-existing comorbidities, whereas there were no differences in risks among women conceiving through FED.

In the models with non-transfusion MM as an outcome, the risks were somewhat higher among women conceiving through ART and AI/IUI before accounting for obstetric comorbidities, but coefficients were not statistically significant. After accounting for obstetric comorbidities, the differences became both small and not statistically significant (Supplementary Table S5).

## **Discussion**

### **Main findings**

Using birth certificates from Utah, we investigated whether and how conception through different types of medically assisted reproduction treatments (fertility-enhancing drugs, AI or IUI, ART with autologous/donor oocytes) is associated with MM. In the unadjusted analyses, more invasive

treatments (ART and AI/IUI) were associated with increased risks of MM, whereas women who conceived using FED had similar risks compared to women who conceived spontaneously.

The adjusted results suggest, in line with the existing literature, that the higher rates of multiple births amongst MAR conceptions play an important role in higher risk of MM amongst women who conceive via MAR. When we adjusted for multifetal gestation (in addition to maternal socio-demographic and health characteristics), the differences in MM between women conceiving through MAR and spontaneously became smaller across all MAR treatment types. Moreover, smaller differences in MM for singleton births further support the argument that the high rates of multiple birth rates associated with MAR are an important driver of these associations. Models including the sociodemographic factors also highlight the role of maternal age at birth and parity. The latter is due with the fact that most MAR children are first-borns, and nulliparity is associated with increased risk of MM. Accounting for maternal age contributed to the attenuation, particularly among women conceiving through ART with donor oocytes compared to other MAR groups due to the older profile of women in this group (mean age at birth 40.4 years vs 28.4 and 30.7 among SC and MAR-all, respectively).

Prior studies have suggested that another potential mechanism explaining the association between MAR and MM is the higher rates of pre-existing comorbidities amongst women who conceive through MAR (Lazariu et al., 2017; Kilpatrick et al., 2016; Hirshberg and Srinivas, 2017; Leonard et al., 2019; Grobman et al., 2014). The results showed that whilst pre-existing comorbidities moderated the association between MM and MAR, women who conceived via MAR remained at higher risk of MM even if they did not have pre-existing comorbidities which suggests pre-existing comorbidities only partially explain the association between MAR and MM. Another potential mechanism linking MAR and MM is the increased rate of obstetric complications such as placenta previa that occur in pregnancies conceived through MAR. After accounting for obstetric comorbidities in our models, the relationship between MAR and MM remained significant, but relatively small compared to other covariates in model 4 (Supplementary Table S2). It is difficult to conclude whether obstetric comorbidities are caused by MAR treatments, as the higher prevalence of obstetric risk factors among

women conceiving through MAR could be driven by subfertility and not by the fact that they undergo MAR.

Other mechanisms which could explain the residual association between MAR and MM, such as the role of subfertility and of the MAR treatments per se, could not be directly tested. Nonetheless, our results showing that more invasive MAR treatments were associated with higher risk of MM could indirectly suggest that subfertility is an unobserved confounder as it is associated with both higher risk of MM and with undergoing more invasive MAR procedures (Belanoff et al., 2016; Luke et al., 2019; Korb et al., 2020). Although it is difficult to quantify the role played by subfertility or MAR treatments per se, adjusted results in Models 2, 3 & 4 suggest that while women undergoing MAR to conceive have higher odds of MM, the differences are small in absolute terms (Table 4) and the size of the residual MAR coefficients is smaller relative to other risk factors like maternal age, multifetal gestation, and parity (Supplementary Table S2). This could suggest that even if the MAR treatments per se play a role in MM, it is unlikely to be large.

### **Strengths and limitations**

This study has several strengths, including the use of high-quality vital records data to analyze MM for the entire Utah population. Such population-based data cover all births in Utah, providing a large sample of MAR conceptions and enabling more accurate MM investigation compared to smaller survey or clinic samples. Although ART usage on birth certificates may be underreported due to self-reporting (Zhang et al., 2010; Cohen et al., 2014; Luke et al., 2016), Thoma et al. (2014) found no significant ART underreporting in Utah compared to clinic-based data, unlike other US states with underreporting over 50%. found no significant underreporting in Utah compared to clinic-based data, unlike other US states with over 50% underreporting. This enhances confidence in Utah's vital records. Additionally, we were able to distinguish between MAR treatments to examine their association with MM. MAR treatment usage in Utah's vital records was comparable to estimates from the Pregnancy Risk Assessment Monitoring System (Stanford et al., 2018). We able accounted for a wide range of

confounding factors confounding, including maternal socio-demographics, pre-existing comorbidities, pregnancy characteristics, and obstetric comorbidities. Reporting quality for maternal and child outcomes, risk factors, and obstetric history was found to be high when compared to medical charts and records across various populations (Reichman and Hade, 2001; DiGiuseppe et al, 2002; Roohan et al, 2003; Northam and Knapp, 2006; Zollinger et al, 2006; Andrade et al 2013). Overall, the high completeness and quality of Utah's birth certificate data make it a valuable source for investigating health outcomes associated with MAR treatments.

We acknowledge some limitations of the study. Although we have utilized all available data related to MM outcomes and obstetric comorbidities from birth certificates, we could not capture the full range of indicators recommended for monitoring maternal health (i.e., pre-eclampsia, sepsis, CDC, 2015). Additionally, while we could identify four major types of MAR procedures, we could not distinguish between specific types and protocols of ART treatments which might affect MM (Nagata et al., 2019; Smith et al., 2023; Cameron et al., 2023). We also did not have information on full histories of previous fertility treatments or the precise duration or cause of infertility which prevented us from investigating in detail the effects of subfertility on maternal morbidity.

## **Contributions**

This study contributes to the understanding on the association between MAR and MM in multiple ways. First, using large population data we could distinguish between types of MAR treatments and show that there is a dose-response pattern as the risk of MM increases as the MAR treatments become more invasive. Women conceiving through FED face similar risks of MM to women conceiving spontaneously. Our findings are in line with previous studies reporting elevated MM among women conceiving through ART in different contexts (Belanoff et al., 2016; Martin et al., 2016; Wang et al., 2016; Dayan et al., 2019; Nagata et al., 2019; Luke et al., 2019; Korb et al., 2020; Sabr et al., 2022). However, we present novel findings by distinguishing between FED and AI/IUI as previous studies considered all non-ART infertility treatments together and while some found elevated MM risks in this group (e.g., Wang et al., 2016), others reported no difference compared to women conceiving



spontaneously (Dyan et al., 2019; Nagata et al., 2019; Korb et al., 2020). Additionally, we could identify women who conceived through ART using donor oocytes, a rising group which is rarely considered in other studies due to the data availability and small sample sizes. Our findings highlight that in relation to other ART and MAR groups this group of women are at the highest risks of MM, which could be related to a range of factors including older maternal age, multifetal gestation as well as more severe form of infertility and more invasive MAR procedures. Second, we have systematically tested several potential mechanisms underlying the association between MM and MAR and showed the importance of multiple births and maternal age at birth, as well as of obstetric complications in explaining some of the association, and the limited role played by pre-existing comorbidities. This study also contributes to the discussion on the role of subfertility and MAR procedures in explaining the increased MM among women conceiving through MAR (Belanoff et al., 2016; Luke et al., 2019; Korb et al., 2020). Our findings showing that the risk of MM increases with more invasive treatments suggest that subfertility could be an important underlying factor as it is associated with both more invasive MAR procedures and MM. More evidence is needed to further investigate these associations and test these arguments.

Our main findings are relevant both for couples experiencing infertility and considering MAR treatments as well as for the public health authorities. Our findings highlight that the increased risks of MM among women conceiving through MAR are strongly associated with multifetal gestation. Multiple pregnancies could lead to increased risks for maternal health as well as adverse perinatal outcomes and health risks for children in later life which could come at high personal and public cost (Beam et al., 2020; Debbink et al., 2022). Multiple pregnancies could be caused by ovarian hyperstimulation syndrome from fertility drugs or multiple embryo transfer during ART procedures. The latter could be a preferred procedure in couples trying to maximize the chances of getting pregnant with fewer costly cycles (Swanson et al., 2020;2021). Recent evidence from the Nordic countries shows how wider state implementation of the elective single embryo transfer (eSET) policy has led to a steady decrease in the proportion of multiple pregnancies in ART over the last 15-20 years

(Opdahl et al., 2020). In comparison, the national rate of eSET in the U.S. started increasing only recently – from 7% in 2009 to 67.3% in 2017 among women aged <35 year (Sunderam et al., 2012, 2020). However, the variation in practices between and within states remains high, with the rate of eSET for women aged <35 years in Utah (59.2%) lying below the national average (Sunderam et al., 2020). The lack of state-funded provision and high costs of infertility treatments could encourage the use of more invasive treatments among younger women, in particular, multiple embryo transfers, to maximize the chances to conceive. Raising awareness about health risks associated with multiple births and benefits of eSET, including similar pregnancy and live birth rate (Veleva et al., 2009; McLernon et al., 2010; Lee et al., 2016; ESHRE Guideline Group on the Number of Embryos to Transfer et al., 2024), could have a significant effect on the choice of treatments and substantially reduce the risks of adverse perinatal outcomes for women and children and associated public costs.

## References

- Andrade SE, Scott PE, Davis RL, Li DK, Getahun D, Cheetham TC, Raebel MA, Toh S, Dublin S, Pawloski PA. Validity of health plan and birth certificate data for pregnancy research. *Pharmacoepidemiology and drug safety* 2013;22: 7-15.
- Beam AL, Fried I, Palmer N, Agniel D, Brat G, Fox K, Kohane I, Sinaiko A, Zupancic JA, Armstrong J. Estimates of healthcare spending for preterm and low-birthweight infants in a commercially insured population: 2008–2016. *Journal of Perinatology* 2020;40: 1091-1099.
- Belanoff C, Declercq ER, Diop H, Gopal D, Kotelchuck M, Luke B, Nguyen T, Stern JE. Severe maternal morbidity and the use of assisted reproductive technology in Massachusetts. *Obstetrics and gynecology* 2016;127: 527.
- Berger BO, Jeffers NK, Wolfson C, Gemmill A. Role of maternal age in increasing severe maternal morbidity rates in the United States. *Obstetrics & Gynecology* 2022: 10.1097.

Berntsen S, Söderström-Anttila V, Wennerholm U-B, Laivuori H, Loft A, Oldereid NB, Romundstad LB, Bergh C, Pinborg A. The health of children conceived by ART: ‘the chicken or the egg?’.

*Human reproduction update* 2019;25: 137-158.

Bitler MP, Schmidt L. Utilization of infertility treatments: the effects of insurance mandates.

*Demography* 2012;49: 125-149.

Cabacungan ET, Ngui EM, McGinley EL. Racial/ethnic disparities in maternal morbidities: a statewide study of labor and delivery hospitalizations in Wisconsin. *Maternal and child health journal*

2012;16: 1455-1467.

Callaghan WM, Creanga AA, Kuklina EV. Severe maternal morbidity among delivery and postpartum hospitalizations in the United States. *Obstetrics & Gynecology* 2012;120: 1029-1036.

Callaghan WM, MacKay AP, Berg CJ. Identification of severe maternal morbidity during delivery hospitalizations, United States, 1991-2003. *American journal of obstetrics and gynecology*

2008;199: 133. e131-133. e138.

Cameron K, Luke B, Murugappan G, Baker VL. Assisted Reproductive Technology and Cardiovascular Risk in Women. *Current Cardiovascular Risk Reports* 2023: 1-11.

Centers for Disease Control and Prevention. Revised definition on Severe Maternal Morbidity. 2015.

Retrieved from

<https://www.cdc.gov/reproductivehealth/maternalinfanthealth/smm/severe-morbidity-ICD.htm>

Chaillet N, Mâsse B, Grobman WA, Shorten A, Gauthier R, Rozenberg P, Dugas M, Pasquier J-C, Audibert F, Abenhaim HA *et al.* Perinatal morbidity among women with a previous caesarean

delivery (PRISMA trial): a cluster-randomised trial. *The Lancet* 2023.

Clark SL, Belfort MA, Dildy GA, Herbst MA, Meyers JA, Hankins GD. Maternal death in the 21st century: causes, prevention, and relationship to cesarean delivery. *American journal of*

*obstetrics and gynecology* 2008;199: 36. e31-36. e35.

- Cohen B, Bernson D, Sappenfield W, Kirby RS, Kissin D, Zhang Y, Copeland G, Zhang Z, Macaluso M, Collaborative SMART. Accuracy of Assisted Reproductive Technology Information on Birth Certificates: Florida and Massachusetts, 2004–06. *Paediatric and Perinatal Epidemiology* 2014;28: 181-190.
- Creanga AA, Bateman BT, Kuklina EV, Callaghan WM. Racial and ethnic disparities in severe maternal morbidity: a multistate analysis, 2008-2010. *American journal of obstetrics and gynecology* 2014;210: 435. e431-435. e438.
- Dayan N, Fell D, Guo Y, Wang H, Velez M, Spitzer K, Laskin C. Severe maternal morbidity in women with high BMI in IVF and unassisted singleton pregnancies. *Human Reproduction* 2018;33: 1548-1556.
- Dayan N, Joseph K, Fell DB, Laskin CA, Basso O, Park AL, Luo J, Guan J, Ray JG. Infertility treatment and risk of severe maternal morbidity: a propensity score–matched cohort study. *Cmaj* 2019;191: E118-E127.
- Dayan N, Pilote L, Opatrny L, Basso O, Messerlian C, El-Messidi A, Daskalopoulou SS. Combined impact of high body mass index and in vitro fertilization on preeclampsia risk: A hospital-based cohort study. *Obesity* 2015;23: 200-206.
- Debbink MP, Metz TD, Nelson RE, Janes SE, Kroes A, Begaye LJ, Heuser CC, Smid MC, Silver RM, Varner MW. Directly measured costs of severe maternal morbidity events during delivery admission compared with uncomplicated deliveries. *American journal of perinatology* 2021;39: 567-576.
- DiGiuseppe DL, Aron DC, Ranbom L, Harper DL, Rosenthal GE. Reliability of birth certificate data: a multi-hospital comparison to medical records information. *Maternal and child health journal* 2002;6: 169-179.
- ESHRE Guideline Group on the Number of Embryos to Transfer, Alteri A, Arroyo G, Baccino G, Craciunas L, De Geyter C, Ebner T, Koleva M, Kordic K, etc. Veleva Z. ESHRE guideline: number of embryos to transfer during IVF/ICSI, *Human Reproduction* 2024;39(4):647–657.

- Geller SE, Rosenberg D, Cox S, Brown M, Simonson L, Kilpatrick S. A scoring system identified near-miss maternal morbidity during pregnancy. *Journal of clinical epidemiology* 2004;57: 716-720.
- Geller SE, Rosenberg D, Cox SM, Kilpatrick S. Defining a conceptual framework for near-miss maternal morbidity. *Journal of the American Medical Women's Association (1972)* 2002;57: 135-139.
- Goisis A, Remes H, Martikainen P, Klemetti R, Myrskylä M. Medically assisted reproduction and birth outcomes: a within-family analysis using Finnish population registers. *The Lancet* 2019;393: 1225-1232.
- Gray KE, Wallace ER, Nelson KR, Reed SD, Schiff MA. Population-based study of risk factors for severe maternal morbidity. *Paediatric and perinatal epidemiology* 2012;26: 506-514.
- Grobman WA, Bailit JL, Rice MM, Wapner RJ, Reddy UM, Varner MW, Thorp Jr JM, Leveno KJ, Caritis SN, Iams JD. Frequency of and factors associated with severe maternal morbidity. *Obstetrics & Gynecology* 2014;123: 804-810.
- Hamilton BH, McManus B. The effects of insurance mandates on choices and outcomes in infertility treatment markets. *Health economics* 2012;21: 994-1016.
- Henne MB, Bundorf MK. Insurance mandates and trends in infertility treatments. *Fertility and sterility* 2008;89: 66-73.
- Hirshberg A, Srinivas SK. Epidemiology of maternal morbidity and mortality *Seminars in perinatology*. 2017. Elsevier, pp. 332-337.
- Kilpatrick SJ, Abreo A, Gould J, Greene N, Main EK. Confirmed severe maternal morbidity is associated with high rate of preterm delivery. *American journal of obstetrics and gynecology* 2016;215: 233. e231-233. e237.
- Korb D, Schmitz T, Seco A, Le Ray C, Santulli P, Goffinet F, Deneux-Tharaux C. Increased risk of severe maternal morbidity in women with twin pregnancies resulting from oocyte donation. *Human Reproduction* 2020;35: 1922-1932.

- Korst LM, Gregory KD, Nicholas LA, Saeb S, Reynen DJ, Troyan JL, Greene N, Fridman M. A scoping review of severe maternal morbidity: describing risk factors and methodological approaches to inform population-based surveillance. *Maternal Health, Neonatology and Perinatology* 2021;7: 1-20.
- Lazariu V, Nguyen T, McNutt L-A, Jeffrey J, Kacica M. Severe maternal morbidity: A population-based study of an expanded measure and associated factors. *PLoS One* 2017;12: e0182343.
- Lee AM, Connell MT, Csokmay JM, Styer AK. Elective single embryo transfer-the power of one. *Contraception and Reproductive Medicine* 2016;1: 1-7.
- Leonard SA, Main EK, Carmichael SL. The contribution of maternal characteristics and cesarean delivery to an increasing trend of severe maternal morbidity. *BMC pregnancy and childbirth* 2019;19: 1-9.
- Luke B, Brown MB. Contemporary risks of maternal morbidity and adverse outcomes with increasing maternal age and plurality. *Fertility and sterility* 2007;88: 283-293.
- Luke B, Brown MB, Spector LG. Validation of infertility treatment and assisted reproductive technology use on the birth certificate in eight states. *American Journal of Obstetrics & Gynecology* 2016;215: 126-127.
- Luke B, Brown MB, Wantman E, Baker VL, Doody KJ, Seifer DB, Spector LG. Risk of severe maternal morbidity by maternal fertility status: a US study in 8 states. *American journal of obstetrics and gynecology* 2019;220: 195. e191-195. e112.
- Luke B, Gopal D, Cabral H, Stern JE, Diop H. Pregnancy, birth, and infant outcomes by maternal fertility status: the Massachusetts Outcomes Study of Assisted Reproductive Technology. *American journal of obstetrics and gynecology* 2017;217: 327. e321-327. e314.
- Main EK, Abreo A, McNulty J, Gilbert W, McNally C, Poeltler D, Lanner-Cusin K, Fenton D, Gipps T, Melsop K. Measuring severe maternal morbidity: validation of potential measures. *American journal of obstetrics and gynecology* 2016;214: 643. e641-643. e610.

Martin AS, Monsour M, Kissin DM, Jamieson DJ, Callaghan WM, Boulet SL. Trends in severe maternal morbidity after assisted reproductive technology in the United States, 2008–2012. *Obstetrics & Gynecology* 2016;127: 59-66.

McDonald S, Murphy K, Beyene J, Ohlsson A. Perinatal outcomes of in vitro fertilization twins: a systematic review and meta-analyses. *American journal of obstetrics and gynecology* 2005;193: 141-152.

McLernon DJ, Harrild K, Bergh C, Davies MJ, De Neubourg D, Dumoulin J, Gerris J, Kremer JA, Martikainen H, Mol B. Clinical effectiveness of elective single versus double embryo transfer: meta-analysis of individual patient data from randomised trials. *Bmj* 2010;341.

Nagata C, Yang L, Yamamoto-Hanada K, Mezawa H, Ayabe T, Ishizuka K, Konishi M, Ohya Y, Saito H, Sago H. Complications and adverse outcomes in pregnancy and childbirth among women who conceived by assisted reproductive technologies: a nationwide birth cohort study of Japan environment and children's study. *BMC pregnancy and childbirth* 2019;19: 1-11.

Northam S, Knapp TR. The reliability and validity of birth certificates. *Journal of Obstetric, Gynecologic & Neonatal Nursing* 2006;35: 3-12.

Pandey S, Shetty A, Hamilton M, Bhattacharya S, Maheshwari A. Obstetric and perinatal outcomes in singleton pregnancies resulting from IVF/ICSI: a systematic review and meta-analysis. *Human reproduction update* 2012;18: 485-503.

Pelikh A, Smith KR, Myrskylä M, Goisis A. Medically assisted reproduction treatment types and birth outcomes: A between-family and within-family analysis. *Obstetrics and Gynecology* 2022;139: 211.

Pinborg A, Wennerholm U-B, Romundstad L, Loft A, Aittomaki K, Söderström-Anttila V, Nygren K, Hazekamp J, Bergh C. Why do singletons conceived after assisted reproduction technology have adverse perinatal outcome? Systematic review and meta-analysis. *Human reproduction update* 2013;19: 87-104.

- Reichman NE, Hade EM. Validation of birth certificate data: a study of women in New Jersey's HealthStart program. *Annals of epidemiology* 2001;11: 186-193.
- Roohan PJ, Josberger RE, Acar J, Dabir P, Feder HM, Gagliano PJ. Validation of birth certificate data in New York State. *Journal of community health* 2003;28: 335-346.
- Sabr Y, Lisonkova S, Skoll A, Brant R, Velez MP, Joseph K. Severe maternal morbidity and maternal mortality associated with assisted reproductive technology. *Journal of Obstetrics and Gynaecology Canada* 2022;44: 978-986.
- Shen JJ, Tymkow C, MacMullen N. Disparities in maternal outcomes among four ethnic populations. *Ethnicity & disease* 2005;15: 492-497.
- Smith J, Fell DB, Basso O, Velez M, Dayan N. Fresh Compared With Frozen Embryo Transfer and Risk of Severe Maternal Morbidity: A Study of In Vitro Fertilization Pregnancies in Ontario, Canada. *Journal of Obstetrics and Gynaecology Canada* 2023;45: 202-210.
- Smith KR, Fraser A, Reed DL, Barlow J, Hanson HA, West J, Knight S, Forsythe N, Mineau GP. The Utah population database. A model for linking medical and genealogical records for population health research. *Hist Life Course Stud* 2022;12: 58-77.
- Snowden JM, Lyndon A, Kan P, El Ayadi A, Main E, Carmichael SL. Severe maternal morbidity: a comparison of definitions and data sources. *American journal of epidemiology* 2021;190: 1890-1897.
- Stanford J, Simonsen S, Baksh L. Fertility treatments and adverse perinatal outcomes in a population-based sampling of births in Florida, Maryland, and Utah: a cross-sectional study. *BJOG: An International Journal of Obstetrics & Gynaecology* 2016;123: 718-729.
- Stanford JB, Schliep K, Najmabadi S, Hemmert R, Tuttle C, Simonsen S, Sanders J, Peterson CM. Infertility and fertility treatment in Utah: a report for the Utah Legislature. *Utah Department of Health* 2018.



Sunderam S, Kissin DM, Crawford SB, Folger SG, Jamieson DJ, Warner L, Barfield WD. Assisted reproductive technology surveillance—United States, 2012. *Morbidity and Mortality Weekly Report: Surveillance Summaries* 2015;64: 1-29.

Sunderam S, Kissin DM, Zhang Y, Jewett A, Boulet SL, Warner L, Kroelinger CD, Barfield WD. Assisted reproductive technology surveillance—United States, 2017. *MMWR Surveillance Summaries* 2020;69: 1.

Sutcliffe AG, Ludwig M. Outcome of assisted reproduction. *The Lancet* 2007;370: 351-359.

Swanson K, Ayala NK, Barnes RB, Desai N, Miller M, Yee LM. Understanding gestational surrogacy in the United States: a primer for obstetricians and gynecologists. *American journal of obstetrics and gynecology* 2020;222: 330-337.

Swanson K, Debbink M, Letourneau JM, Kuppermann M, Einerson BD. Association of multifetal gestation with obstetric and neonatal outcomes in gestational carrier pregnancies. *Journal of Assisted Reproduction and Genetics* 2021;38: 661-667.

Thoma ME, Boulet S, Martin JA, Kissin D. Births resulting from assisted reproductive technology: comparing birth certificate and National ART Surveillance System Data, 2011. *National Vital Statistics Reports: From the Centers for Disease Control and Prevention, National Center for Health Statistics, National Vital Statistics System* 2014;63: 1-11.

Tierney KI, Guzzo KB. Medically Assisted Reproduction in the United States: A Focus on Parents 40 and Older. *Socius* 2023;9: 23780231231205191.

Veleva Z, Karinen P, Tomas C, Tapanainen JS, Martikainen H. Elective single embryo transfer with cryopreservation improves the outcome and diminishes the costs of IVF/ICSI. *Human Reproduction* 2009;24: 1632-1639.

Wang ET, Ozimek JA, Greene N, Ramos L, Vyas N, Kilpatrick SJ, Pisarska MD. Impact of fertility treatment on severe maternal morbidity. *Fertility and sterility* 2016;106: 423-426.

Wen SW, Demissie K, Yang Q, Walker MC. Maternal morbidity and obstetric complications in triplet pregnancies and quadruplet and higher-order multiple pregnancies. *American journal of obstetrics and gynecology* 2004;191: 254-258.

Witteveen T, Van Den Akker T, Zwart JJ, Bloemenkamp KW, Van Roosmalen J. Severe acute maternal morbidity in multiple pregnancies: a nationwide cohort study. *American journal of obstetrics and gynecology* 2016;214: 641. e641-641. e610.

Wyns C, De Geyter C, Calhaz-Jorge C, Kupka M, Motrenko T, Smeenk J, Bergh C, Tandler-Schneider A, Rugescu I. ART in Europe, 2017: results generated from European registries by ESHRE. *Human reproduction open* 2021;2021: hoab026.

Zhang Z, Macaluso M, Cohen B, Schieve L, Nannini A, Chen M, Wright V, Research MCFARTE. Accuracy of assisted reproductive technology information on the Massachusetts birth certificate, 1997–2000. *Fertility and sterility* 2010;94: 1657-1661.

Zollinger TW, Przybylski MJ, Gamache RE. Reliability of Indiana birth certificate data compared to medical records. *Annals of epidemiology* 2006;16: 1-10.

**Table 1. Rates of maternal morbidity per 10,000 births among women giving birth in Utah, 2009–2017, by mode of conception and type of medically assisted reproduction treatment**

| <b>Maternal morbidity indicator</b> | <b>SC</b> | <b>MAR</b> | <b>FED</b> | <b>AI/IUI</b> | <b>ART w/<br/>autologous<br/>oocytes</b> | <b>ART w/<br/>donor<br/>oocytes</b> | <b>Total</b> |
|-------------------------------------|-----------|------------|------------|---------------|------------------------------------------|-------------------------------------|--------------|
| Blood transfusion                   | 67        | 127        | 76         | 118           | 240                                      | 460                                 | 69           |
| Unplanned operating room procedure  | 18        | 26         | 15         | *             | 44                                       | *                                   | 18           |
| Admission to ICU                    | 12        | 21         | 14         | *             | 37                                       | *                                   | 12           |
| Eclampsia                           | 11        | 12         | 9          | *             | *                                        | *                                   | 11           |
| Unplanned hysterectomy              | 5         | 9          | *          | *             | *                                        | *                                   | 5            |
| Ruptured uterus                     | 3         | *          | *          | *             | *                                        | *                                   | 3            |
| Any of the above                    | 95        | 167        | 104        | 172           | 299                                      | 521                                 | 99           |

Note: MAR refers to all births where the neonate was conceived after any of the following procedures: Artificial insemination or intrauterine insemination (AI/IUI); Assisted reproductive technology (ART with autologous or donor eggs); or Fertility enhancing drugs (FED). SC stands for ‘spontaneous conception’. \* values less than <10 people per cell were suppressed due to the data provider’s restrictions.

**Table 2. Maternal and pregnancy characteristics and obstetric comorbidities among women giving birth in Utah, 2009–2017, by mode of conception and type of medically assisted reproduction treatment (in percentages)**

| Maternal characteristics                          | SC        | MAR       | FED       | AI/IUI    | ART w/<br>autologous<br>oocytes | ART w/<br>donor<br>oocytes | Total     |
|---------------------------------------------------|-----------|-----------|-----------|-----------|---------------------------------|----------------------------|-----------|
| <b>Maternal pre-existing comorbidities</b>        |           |           |           |           |                                 |                            |           |
| Chronic renal disease                             | 0.9       | 1.1       | 1.1       | 1.2       | 1.0                             | *                          | 0.9       |
| Heart disease                                     | 0.6       | 1.0       | 1.0       | 1.0       | 0.9                             | *                          | 0.7       |
| Chronic hypertension                              | 1.0       | 2.0       | 2.0       | 1.9       | 1.9                             | 4.3                        | 1.1       |
| Asthma                                            | 4.4       | 4.8       | 4.7       | 5.2       | 4.7                             | 7.4                        | 4.4       |
| Insulin-dependent diabetes                        | 0.6       | 0.7       | 0.8       | 0.8       | 0.6                             | NA                         | 0.6       |
| Mother's BMI pre-pregnancy (kg/m <sup>2</sup> )   |           |           |           |           |                                 |                            |           |
| underweight (<18.5)                               | 4.5       | 3.5       | 3.4       | 3.5       | 3.6                             | *                          | 4.4       |
| healthy weight (18.5-24.9)                        | 51.9      | 48.5      | 44.7      | 51.1      | 57.0                            | 47.2                       | 51.8      |
| overweight (25-29.9)                              | 22.8      | 22.9      | 23.1      | 22.7      | 22.3                            | 27.6                       | 22.8      |
| obese (30+)                                       | 18.8      | 24.2      | 28.0      | 22.2      | 16.4                            | 20.6                       | 19.0      |
| unknown                                           | 2.1       | 0.7       | 0.8       | 0.5       | 0.8                             | *                          | 2.0       |
| Anxiety, depression or bipolar                    | 9.3       | 9.9       | 9.7       | 10.7      | 10.0                            | 15.0                       | 9.4       |
| Previous Cesarean birth                           | 10.4      | 10.1      | 10.8      | 8.7       | 9.3                             | 9.2                        | 10.3      |
| Smoking prior to pregnancy                        | 5.2       | 1.2       | 1.5       | 0.9       | 0.7                             | NA                         | 5.1       |
| <b>Maternal socio-demographic characteristics</b> |           |           |           |           |                                 |                            |           |
| Maternal age at birth, mean (sd)                  | 28.4(5.3) | 30.7(4.9) | 29.4(4.4) | 31.7(4.7) | 32.8(4.7)                       | 40.4(6.5)                  | 28.5(5.3) |
| Mother married at birth                           | 79.3      | 96.61     | 97.1      | 93.5      | 97.8                            | 91.4                       | 80.1      |
| Mother has university degree or above             | 29.4      | 46.4      | 40.4      | 51.6      | 57.3                            | 63.8                       | 30.1      |
| unknown                                           | 2.4       | 0.8       | 0.5       | 1.0       | 1.2                             | 4.0                        | 2.4       |
| Hispanic origin                                   | 24.5      | 13.5      | 14.8      | 12.5      | 10.9                            | 14.4                       | 24.0      |
| unknown                                           | 0.1       | 0.2       | 0.1       | *         | *                               | *                          | 0.1       |
| First birth                                       | 31.7      | 49.1      | 44.2      | 56.9      | 55.6                            | 61.4                       | 32.5      |
| <b>Multifetal gestation</b>                       | 1.2       | 13.7      | 7.3       | 11.9      | 30.4                            | 27.6                       | 1.7       |
| <b>Obstetric comorbidities</b>                    |           |           |           |           |                                 |                            |           |
| Placenta previa                                   | 0.4       | 1.1       | 0.7       | 1.3       | 1.9                             | *                          | 0.5       |
| HELLP syndrome                                    | 0.2       | 0.4       | 0.3       | 0.5       | 0.6                             | *                          | 0.2       |
| Placental abruption                               | 1.1       | 1.8       | 1.6       | 1.7       | 2.3                             | *                          | 1.2       |
| Preterm delivery                                  | 8.1       | 17.7      | 13.0      | 17.1      | 28.8                            | 37.1                       | 8.5       |
| Pregnancy-induced hypertension                    | 5.2       | 9.1       | 8.0       | 9.5       | 10.9                            | 20.9                       | 5.3       |
| Gestational diabetes                              | 4.5       | 7.6       | 7.3       | 8.0       | 7.9                             | 13.5                       | 4.6       |
| Clinical chorioamnionitis                         | 3.1       | 3.7       | 3.5       | 4.3       | 3.7                             | 6.1                        | 3.2       |
| Cesarean birth                                    | 21.4      | 34.5      | 29.6      | 33.1      | 45.5                            | 66.6                       | 22.0      |

Note MAR refers to all births where the neonate was conceived after any of the following procedures: Artificial insemination or intrauterine insemination (AI/IUI); Assisted reproductive technology (ART with autologous or donor eggs); or Fertility enhancing drugs (FED). SC stands for 'spontaneous conception'. BMI = body mass index \* values less than <10 people per cell were suppressed due to the data provider's restrictions.

**Table 3. Odds Ratios and 95% Confidence Intervals for maternal morbidity among women giving birth in Utah, 2009–2017, medically assisted reproduction compared with spontaneous conception**

|                                       | Model 1 (Baseline) | Model 2 (Maternal pre-existing comorbidities + socio-demographic characteristics) | Model 3 (Model 2 + multifetal gestation) | Model 4 (Model 3 + obstetric comorbidities) |
|---------------------------------------|--------------------|-----------------------------------------------------------------------------------|------------------------------------------|---------------------------------------------|
| <b>a) All births</b>                  |                    |                                                                                   |                                          |                                             |
| MAR ( <i>reference - SC</i> )         | 1.76 (1.57–1.98)   | 1.63 (1.45–1.84)                                                                  | 1.27 (1.12–1.43)                         | 1.11 (0.98–1.26)                            |
| Type of MAR ( <i>reference - SC</i> ) |                    |                                                                                   |                                          |                                             |
| FED                                   | 1.09 (0.91–1.30)   | 1.07 (0.89–1.28)                                                                  | 0.95 (0.79–1.14)                         | 0.87 (0.73–1.05)                            |
| AI/IUI                                | 1.85 (1.39–2.46)   | 1.65 (1.24–2.19)                                                                  | 1.36 (1.02–1.81)                         | 1.16 (0.86–1.56)                            |
| ART w/ autologous oocytes             | 3.20 (2.69–3.81)   | 2.83 (2.36–3.39)                                                                  | 1.77 (1.46–2.15)                         | 1.46 (1.20–1.78)                            |
| ART w/donor oocytes                   | 5.71 (3.50–9.31)   | 3.85 (2.29–6.46)                                                                  | 2.46 (1.44–4.22)                         | 1.70 (0.95–3.04)                            |
| <b>b) Singleton births</b>            |                    |                                                                                   |                                          |                                             |
| MAR ( <i>reference - SC</i> )         | 1.28 (1.11–1.48)   | 1.19 (1.03–1.38)                                                                  |                                          | 1.03 (0.89–1.20)                            |
| Type of MAR ( <i>reference - SC</i> ) |                    |                                                                                   |                                          |                                             |
| FED                                   | 0.97 (0.79–1.18)   | 0.95 (0.77–1.16)                                                                  |                                          | 0.88 (0.71–1.07)                            |
| AI/IUI                                | 1.57 (1.13–2.19)   | 1.40 (1.00–1.95)                                                                  |                                          | 1.21 (0.86–1.70)                            |
| ART w/ autologous oocytes             | 1.87 (1.42–2.46)   | 1.64 (1.24–2.18)                                                                  |                                          | 1.25 (0.93–1.66)                            |
| ART w/donor oocytes                   | 4.71 (2.50–2.87)   | 3.09 (1.61–5.94)                                                                  |                                          | 1.58 (0.74–3.38)                            |

Note: MAR refers to all births where the neonate was conceived after any of the following procedures: Artificial insemination or intrauterine insemination (AI/IUI); Assisted reproductive technology (ART with autologous or donor eggs); or Fertility enhancing drugs (FED). SC stands for 'spontaneous conception'. 95% confidence intervals are presented in brackets.

**Table 4. Predicted probabilities (adjusted for covariates) and 95% Confidence Intervals for maternal morbidity among women giving birth in Utah, 2009–2017, by mode of conception (from Model 3 in Table 3)**

| Mode of conception       | Predicted probability of MM (95% CI) |
|--------------------------|--------------------------------------|
| SC                       | 0.0090 (0.0087–0.0093)               |
| MAR (all)                | 0.0113 (0.0100–0.0127)               |
| FED                      | 0.0085 (0.0070–0.0100)               |
| AI/IUI                   | 0.0121 (0.0087–0.0156)               |
| ART w/autologous oocytes | 0.0158 (0.0128–0.0188)               |
| ART w/donor oocytes      | 0.0218 (0.0103–0.0333)               |

Note: MAR refers to all births where the neonate was conceived after any of the following procedures: Artificial insemination or intrauterine insemination (AI/IUI); Assisted reproductive technology (ART with autologous or donor eggs); or Fertility enhancing drugs (FED). SC stands for ‘spontaneous conception’. 95% confidence intervals are presented in brackets. The predicted probabilities represent the average predicted probabilities after adjustments over the distribution of the categorical covariates in the data (see full list in Table 2).

**Table 5. Odds Ratios and 95% Confidence Intervals for maternal morbidity among women giving birth in Utah, 2009–2017, by mode of conception and pre-existing comorbidities**

|                                                               | Model M1<br>(Interaction<br>between mode<br>of conception<br>and whether<br>mother had any<br>pre-existing<br>comorbidities) | Model M2<br>(Model M1 +<br>socio-<br>demographic<br>characteristics) | Model M3 (Model<br>M2 + multifetal<br>gestation) | Model M4<br>(Model M3 +<br>obstetric<br>comorbidities) |
|---------------------------------------------------------------|------------------------------------------------------------------------------------------------------------------------------|----------------------------------------------------------------------|--------------------------------------------------|--------------------------------------------------------|
| <b>a) All births</b>                                          |                                                                                                                              |                                                                      |                                                  |                                                        |
| SC no pre-existing<br>comorbidities (reference)               | 1                                                                                                                            | 1                                                                    | 1                                                | 1                                                      |
| SC w/ pre-existing<br>comorbidities                           | 1.28 (1.21–1.37)                                                                                                             | 1.24 (1.17–1.33)                                                     | 1.24 (1.16–1.32)                                 | 1.06 (1.00–1.13)                                       |
| MAR no pre-existing<br>comorbidities                          | 1.92 (1.66–2.21)                                                                                                             | 1.81 (1.56–2.09)                                                     | 1.39 (1.19–1.61)                                 | 1.17 (1.01–1.37)                                       |
| MAR w/ pre-existing<br>comorbidities                          | 1.95 (1.62–2.34)                                                                                                             | 1.79 (1.48–2.15)                                                     | 1.41 (1.16–1.70)                                 | 1.08 (0.88–1.31)                                       |
| <b>b) By type of MAR treatment</b>                            |                                                                                                                              |                                                                      |                                                  |                                                        |
| SC no pre-existing<br>comorbidities (reference)               | 1                                                                                                                            | 1                                                                    | 1                                                | 1                                                      |
| SC w/ pre-existing<br>comorbidities                           | 1.28 (1.21–1.37)                                                                                                             | 1.24 (1.17–1.33)                                                     | 1.24 (1.16–1.32)                                 | 1.06 (1.00–1.13)                                       |
| FED no pre-existing<br>comorbidities                          | 1.17 (0.92–1.48)                                                                                                             | 1.18 (0.93–1.49)                                                     | 1.04 (0.82–1.32)                                 | 0.93 (0.73–1.18)                                       |
| FED w/ pre-existing<br>comorbidities                          | 1.23 (0.92–1.63)                                                                                                             | 1.20 (0.90–1.59)                                                     | 1.07 (0.80–1.42)                                 | 0.84 (0.63–1.12)                                       |
| ART w/ autologous<br>oocytes no pre-existing<br>comorbidities | 3.52 (2.86–4.33)                                                                                                             | 3.13 (2.53–3.88)                                                     | 1.96 (1.57–2.45)                                 | 1.53 (1.22–1.92)                                       |
| ART w/ autologous<br>oocytes w/ pre-existing<br>comorbidities | 3.44 (2.51–4.72)                                                                                                             | 2.93 (2.13–4.03)                                                     | 1.78 (1.27–2.49)                                 | 1.36 (0.97–1.91)                                       |

Note: MAR refers to all births where the neonate was conceived after any of the following procedures: Artificial insemination or intrauterine insemination (AI/IUI); Assisted reproductive technology (ART with autologous or donor eggs); or Fertility enhancing drugs (FED). SC stands for ‘spontaneous conception’. 95% confidence intervals are presented in brackets. Pre-existing comorbidities are defined as having at least one of the following conditions: asthma, chronic renal disease, chronic hypertension, heart disease, insulin-dependent diabetes, major mental health disorder (anxiety, depression, bipolar), smoking, and obesity.

Figure 1. Study sample flow diagram

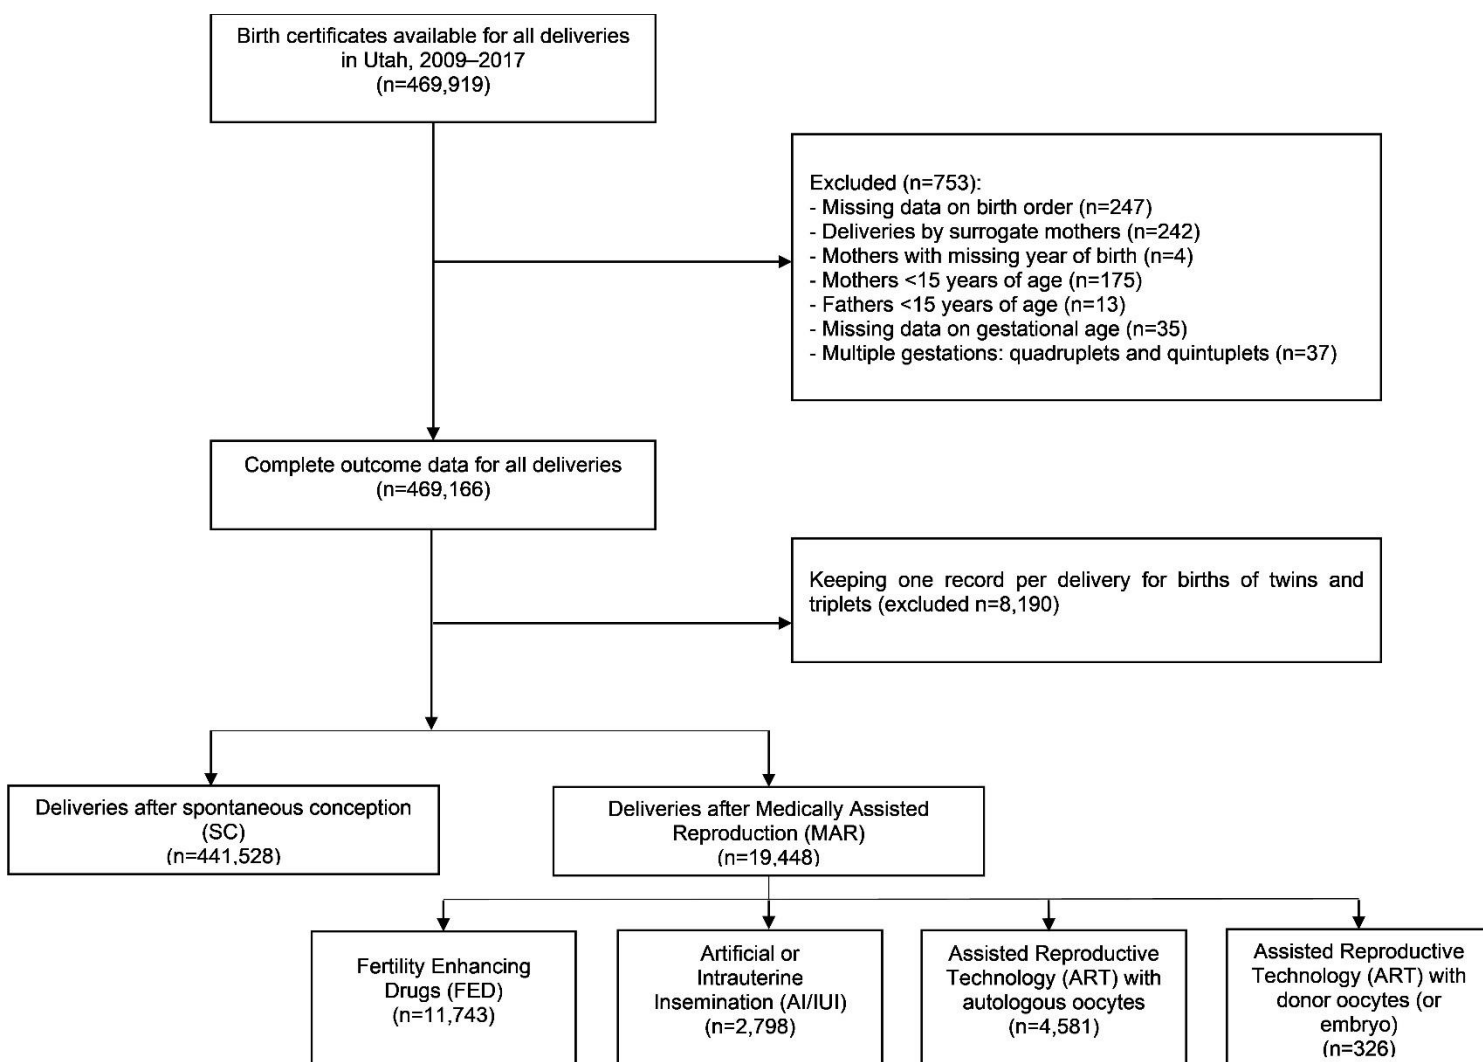



**Supplemental Table S1. Number of maternal morbidity occurrences among women giving birth in Utah, 2009–2017, by mode of conception and type of medically assisted reproduction treatment**

| <b>Maternal morbidity indicator</b> | <b>SC</b> | <b>MAR</b> | <b>FED</b> | <b>AI/IUI</b> | <b>ART w/<br/>own<br/>eggs</b> | <b>ART w/<br/>donor<br/>eggs</b> | <b>Total</b> |
|-------------------------------------|-----------|------------|------------|---------------|--------------------------------|----------------------------------|--------------|
| Blood transfusion                   | 2,941     | 247        | 89         | 33            | 110                            | 15                               | 3,188        |
| Unplanned operating room procedure  | 788       | 51         | 18         | *             | 20                             | *                                | 839          |
| Admission to ICU                    | 513       | 41         | 17         | *             | 17                             | *                                | 554          |
| Eclampsia                           | 475       | 24         | 10         | *             | *                              | *                                | 499          |
| Unplanned hysterectomy              | 217       | 18         | *          | *             | *                              | *                                | 236          |
| Ruptured uterus                     | 112       | *          | *          | *             | *                              | *                                | 119          |
| Any of the above                    | 4,216     | 324        | 122        | 48            | 137                            | 17                               | 4,541        |
| Total number of deliveries          | 441,528   | 19,448     | 11,743     | 2,798         | 4,581                          | 326                              | 460,976      |

Note: MAR refers to all births where the neonate was conceived after any of the following procedures: Artificial insemination or intrauterine insemination (AI/IUI); Assisted reproductive technology (ART with autologous or donor eggs); or Fertility enhancing drugs (FED). SC stands for ‘spontaneous conception’. \* values less than <10 people per cell were suppressed due to the data provider’s restrictions.

**Supplemental Table S2. Odds Ratios for maternal morbidity among women giving birth in Utah, 2009–2017, medically assisted reproduction compared with spontaneous conception (all births)**

|                                                              | MAR as one category |                                                                                   |                                          |                                             | By type of MAR treatment |                                                                                   |                                          |                                             |
|--------------------------------------------------------------|---------------------|-----------------------------------------------------------------------------------|------------------------------------------|---------------------------------------------|--------------------------|-----------------------------------------------------------------------------------|------------------------------------------|---------------------------------------------|
|                                                              | Model 1 (Baseline)  | Model 2 (Maternal pre-existing comorbidities + socio-demographic characteristics) | Model 3 (Model 2 + multifetal gestation) | Model 4 (Model 3 + obstetric comorbidities) | Model 1 (Baseline)       | Model 2 (Maternal pre-existing comorbidities + socio-demographic characteristics) | Model 3 (Model 2 + multifetal gestation) | Model 4 (Model 3 + obstetric comorbidities) |
| MAR (ref: SC)                                                | 1.76***             | 1.63***                                                                           | 1.27***                                  | 1.11                                        |                          |                                                                                   |                                          |                                             |
| FED                                                          |                     |                                                                                   |                                          |                                             | 1.09                     | 1.07                                                                              | 0.95                                     | 0.87                                        |
| AI/IUI                                                       |                     |                                                                                   |                                          |                                             | 1.85***                  | 1.65***                                                                           | 1.36*                                    | 1.16                                        |
| ART w/autologous oocytes                                     |                     |                                                                                   |                                          |                                             | 3.20***                  | 2.83***                                                                           | 1.77***                                  | 1.46***                                     |
| ART w/donor oocytes                                          |                     |                                                                                   |                                          |                                             | 5.71***                  | 3.85***                                                                           | 2.46**                                   | 1.70                                        |
| Chronic renal disease                                        |                     | 1.64***                                                                           | 1.65***                                  | 1.50***                                     |                          | 1.64***                                                                           | 1.65***                                  | 1.51***                                     |
| Heart disease                                                |                     | 1.98***                                                                           | 1.96***                                  | 1.80***                                     |                          | 1.99***                                                                           | 1.97***                                  | 1.81***                                     |
| Chronic hypertension                                         |                     | 1.25                                                                              | 1.23                                     | 1.13                                        |                          | 1.25                                                                              | 1.23                                     | 1.13                                        |
| Asthma                                                       |                     | 1.24***                                                                           | 1.24**                                   | 1.18*                                       |                          | 1.24**                                                                            | 1.24**                                   | 1.18*                                       |
| Insulin-dependent diabetes                                   |                     | 2.17***                                                                           | 2.15***                                  | 1.41**                                      |                          | 2.19***                                                                           | 2.17***                                  | 1.42**                                      |
| Mother's BMI pre-pregnancy (ref: healthy weight (18.5-24.9)) |                     |                                                                                   |                                          |                                             |                          |                                                                                   |                                          |                                             |
| underweight (<18.5)                                          |                     | 0.98                                                                              | 0.99                                     | 0.99                                        |                          | 0.98                                                                              | 0.99                                     | 0.99                                        |
| overweight (25-29.9)                                         |                     | 1.00                                                                              | 1.00                                     | 0.95                                        |                          | 1.01                                                                              | 1.01                                     | 0.95                                        |
| obese (30+)                                                  |                     | 1.06                                                                              | 1.06                                     | 0.94                                        |                          | 1.08                                                                              | 1.07                                     | 0.94                                        |
| unknown                                                      |                     | 1.69***                                                                           | 1.68***                                  | 1.47***                                     |                          | 1.70***                                                                           | 1.68***                                  | 1.47***                                     |
| Anxiety, depression or bipolar                               |                     | 1.15**                                                                            | 1.14**                                   | 1.07                                        |                          | 1.14**                                                                            | 1.14**                                   | 1.07                                        |
| Previous cesarian birth                                      |                     | 1.99***                                                                           | 1.99***                                  | 1.16**                                      |                          | 1.99***                                                                           | 1.99***                                  | 1.16**                                      |
| Smoking prior to pregnancy                                   |                     | 1.08                                                                              | 1.07                                     | 1.01                                        |                          | 1.08                                                                              | 1.07                                     | 1.01                                        |
| Maternal age (ref: 25-29)                                    |                     |                                                                                   |                                          |                                             |                          |                                                                                   |                                          |                                             |
| 15-24                                                        |                     | 1                                                                                 | 1.01                                     | 1.07                                        |                          | 1                                                                                 | 1.01                                     | 1.08                                        |
| 30-34                                                        |                     | 1.15***                                                                           | 1.13**                                   | 1.07                                        |                          | 1.13**                                                                            | 1.13**                                   | 1.07                                        |
| 35-39                                                        |                     | 1.46***                                                                           | 1.44***                                  | 1.27***                                     |                          | 1.42***                                                                           | 1.41***                                  | 1.25***                                     |
| 40+                                                          |                     | 1.80***                                                                           | 1.77***                                  | 1.43***                                     |                          | 1.65***                                                                           | 1.67***                                  | 1.36**                                      |
| Mother married at birth                                      |                     | 0.84***                                                                           | 0.84***                                  | 0.87***                                     |                          | 0.84***                                                                           | 0.84***                                  | 0.87***                                     |
| Mother has tertiary education                                |                     | 0.94                                                                              | 0.94                                     | 0.98                                        |                          | 0.93                                                                              | 0.93                                     | 0.98                                        |
| unknown                                                      |                     | 1.18                                                                              | 1.17                                     | 1.13                                        |                          | 1.17                                                                              | 1.17                                     | 1.12                                        |
| Hispanic origin                                              |                     | 1.01                                                                              | 1.01                                     | 1.01                                        |                          | 1.01                                                                              | 1.01                                     | 1.02                                        |
| unknown                                                      |                     | 0.88                                                                              | 0.86                                     | 0.86                                        |                          | 0.87                                                                              | 0.85                                     | 0.86                                        |
| First birth                                                  |                     | 1.60***                                                                           | 1.59***                                  | 1.31***                                     |                          | 1.57***                                                                           | 1.58***                                  | 1.30***                                     |
| Multifetal gestation                                         |                     |                                                                                   | 3.41***                                  | 1.64***                                     |                          |                                                                                   | 3.18***                                  | 1.56***                                     |
| Placenta previa                                              |                     |                                                                                   |                                          | 5.27***                                     |                          |                                                                                   |                                          | 5.23***                                     |
| HELLP syndrome                                               |                     |                                                                                   |                                          | 4.71***                                     |                          |                                                                                   |                                          | 4.71***                                     |
| Placental abruption                                          |                     |                                                                                   |                                          | 3.06***                                     |                          |                                                                                   |                                          | 3.06***                                     |
| Preterm delivery                                             |                     |                                                                                   |                                          | 2.08***                                     |                          |                                                                                   |                                          | 2.08***                                     |
| Pregnancy-induced hypertension                               |                     |                                                                                   |                                          | 1.37***                                     |                          |                                                                                   |                                          | 1.37***                                     |
| Gestational diabetes                                         |                     |                                                                                   |                                          | 0.9                                         |                          |                                                                                   |                                          | 0.9                                         |

|                           |         |         |         |         |         |         |         |         |
|---------------------------|---------|---------|---------|---------|---------|---------|---------|---------|
| Clinical chorioamnionitis |         |         |         | 1.65*** |         |         |         | 1.65*** |
| Cesarian birth            |         |         |         | 2.30*** |         |         |         | 2.29*** |
| Constant                  | 0.01*** | 0.01*** | 0.01*** | 0.01*** | 0.01*** | 0.01*** | 0.01*** | 0.01*** |
| N                         | 460976  | 460976  | 460976  | 460976  | 460976  | 460976  | 460976  | 460976  |

Note: MAR refers to all births where the neonate was conceived after any of the following procedures: Artificial insemination or intrauterine insemination (AI/IUI); Assisted reproductive technology (ART with autologous or donor eggs); or Fertility enhancing drugs (FED). SC stands for 'spontaneous conception'. \*\*\* P < 0.001, \*\*P < 0.01, \*P < 0.05

**Supplemental Table S3. Odds Ratios for maternal morbidity among women giving birth in Utah, 2009–2017, medically assisted reproduction compared with spontaneous conception (singleton births)**

|                                                              | MAR as one category |                                                                                   |                                             | By type of treatment |                                                                                   |                                             |
|--------------------------------------------------------------|---------------------|-----------------------------------------------------------------------------------|---------------------------------------------|----------------------|-----------------------------------------------------------------------------------|---------------------------------------------|
|                                                              | Model 1 (Baseline)  | Model 2 (Maternal pre-existing comorbidities + socio-demographic characteristics) | Model 4 (Model 3 + obstetric comorbidities) | Model 1 (Baseline)   | Model 2 (Maternal pre-existing comorbidities + socio-demographic characteristics) | Model 4 (Model 3 + obstetric comorbidities) |
| MAR (ref: SC)                                                | 1.28***             | 1.19*                                                                             | 1.03                                        |                      |                                                                                   |                                             |
| FED                                                          |                     |                                                                                   |                                             | 0.97                 | 0.95                                                                              | 0.88                                        |
| AI/IUI                                                       |                     |                                                                                   |                                             | 1.57**               | 1.40*                                                                             | 1.21                                        |
| ART w/autologous oocytes                                     |                     |                                                                                   |                                             | 1.87***              | 1.64***                                                                           | 1.24                                        |
| ART w/donor oocytes                                          |                     |                                                                                   |                                             | 4.71***              | 3.09***                                                                           | 1.58                                        |
| Chronic renal disease                                        |                     | 1.62***                                                                           | 1.48**                                      |                      | 1.63***                                                                           | 1.48**                                      |
| Heart disease                                                |                     | 2.04***                                                                           | 1.84***                                     |                      | 2.05***                                                                           | 1.84***                                     |
| Chronic hypertension                                         |                     | 1.28*                                                                             | 1.15                                        |                      | 1.28*                                                                             | 1.15                                        |
| Asthma                                                       |                     | 1.25***                                                                           | 1.19*                                       |                      | 1.25***                                                                           | 1.19*                                       |
| Insulin-dependent diabetes                                   |                     | 2.18***                                                                           | 1.39*                                       |                      | 2.19***                                                                           | 1.40*                                       |
| Mother's BMI pre-pregnancy (ref: healthy weight (18.5-24.9)) |                     |                                                                                   |                                             |                      |                                                                                   |                                             |
| underweight (<18.5)                                          |                     | 0.98                                                                              | 0.98                                        |                      | 0.98                                                                              | 0.98                                        |
| overweight (25-29.9)                                         |                     | 0.99                                                                              | 0.94                                        |                      | 0.99                                                                              | 0.94                                        |
| obese (30+)                                                  |                     | 1.07                                                                              | 0.93                                        |                      | 1.07                                                                              | 0.94                                        |
| unknown                                                      |                     | 1.73***                                                                           | 1.49***                                     |                      | 1.73***                                                                           | 1.50***                                     |
| Anxiety, depression or bipolar                               |                     | 1.16**                                                                            | 1.07                                        |                      | 1.15**                                                                            | 1.07                                        |
| Previous cesarian birth                                      |                     | 2.01***                                                                           | 1.13*                                       |                      | 2.01***                                                                           | 1.13*                                       |
| Smoking prior to pregnancy                                   |                     | 1.10                                                                              | 1.03                                        |                      | 1.10                                                                              | 1.03                                        |
| Maternal age (ref: 25-29)                                    |                     |                                                                                   |                                             |                      |                                                                                   |                                             |
| 15-24                                                        |                     | 0.98                                                                              | 1.05                                        |                      | 0.98                                                                              | 1.05                                        |
| 30-34                                                        |                     | 1.12**                                                                            | 1.05                                        |                      | 1.11*                                                                             | 1.05                                        |
| 35-39                                                        |                     | 1.42***                                                                           | 1.24***                                     |                      | 1.40***                                                                           | 1.23***                                     |
| 40+                                                          |                     | 1.86***                                                                           | 1.49***                                     |                      | 1.77***                                                                           | 1.45***                                     |
| Mother married at birth                                      |                     | 0.85***                                                                           | 0.88**                                      |                      | 0.85***                                                                           | 0.88**                                      |
| Mother has tertiary education                                |                     | 0.91*                                                                             | 0.95                                        |                      | 0.90**                                                                            | 0.95                                        |
| unknown                                                      |                     | 1.17                                                                              | 1.13                                        |                      | 1.16                                                                              | 1.13                                        |
| Hispanic origin                                              |                     | 1.00                                                                              | 1.01                                        |                      | 1.00                                                                              | 1.01                                        |
| unknown                                                      |                     | 0.95                                                                              | 0.94                                        |                      | 0.94                                                                              | 0.93                                        |
| First birth                                                  |                     | 1.60***                                                                           | 1.31***                                     |                      | 1.59***                                                                           | 1.30***                                     |
| Placenta previa                                              |                     |                                                                                   | 5.35***                                     |                      |                                                                                   | 5.32***                                     |
| HELLP syndrome                                               |                     |                                                                                   | 4.82***                                     |                      |                                                                                   | 4.80***                                     |
| Placental abruption                                          |                     |                                                                                   | 3.05***                                     |                      |                                                                                   | 3.06***                                     |
| Preterm delivery                                             |                     |                                                                                   | 2.11***                                     |                      |                                                                                   | 2.11***                                     |
| Pregnancy-induced hypertension                               |                     |                                                                                   | 1.36***                                     |                      |                                                                                   | 1.36***                                     |
| Gestational diabetes                                         |                     |                                                                                   | 0.90                                        |                      |                                                                                   | 0.90                                        |
| Clinical chorioamnionitis                                    |                     |                                                                                   | 1.61***                                     |                      |                                                                                   | 1.61***                                     |
| Cesarian birth                                               |                     |                                                                                   | 2.39***                                     |                      |                                                                                   | 2.39***                                     |
| Constant                                                     | 0.01***             | 0.01***                                                                           | 0.01***                                     | 0.01***              | 0.01***                                                                           | 0.01***                                     |
| N                                                            | 452973              | 452973                                                                            | 452973                                      | 452973               | 452973                                                                            | 452973                                      |

Note: MAR refers to all births where the neonate was conceived after any of the following procedures: Artificial insemination or intrauterine insemination (AI/IUI); Assisted reproductive technology (ART with autologous or donor eggs); or Fertility enhancing drugs (FED). SC stands for 'spontaneous conception'. \*\*\* P < 0.001, \*\*P < 0.01, \*P < 0.05

**Supplemental Table S4. Odds Ratios for non-transfusion maternal morbidity among women giving birth in Utah, 2009–2017, medically assisted reproduction compared with spontaneous conception (all births)**

|                                                              | MAR as one category |                                                                                   |                                          |                                             | By type of treatment |                                                                                   |                                          |                                             |
|--------------------------------------------------------------|---------------------|-----------------------------------------------------------------------------------|------------------------------------------|---------------------------------------------|----------------------|-----------------------------------------------------------------------------------|------------------------------------------|---------------------------------------------|
|                                                              | Model 1 (Baseline)  | Model 2 (Maternal pre-existing comorbidities + socio-demographic characteristics) | Model 3 (Model 2 + multifetal gestation) | Model 4 (Model 3 + obstetric comorbidities) | Model 1 (Baseline)   | Model 2 (Maternal pre-existing comorbidities + socio-demographic characteristics) | Model 3 (Model 2 + multifetal gestation) | Model 4 (Model 3 + obstetric comorbidities) |
| MAR (ref: SC)                                                | 1.44***             | 1.29**                                                                            | 1.12                                     | 0.96                                        |                      |                                                                                   |                                          |                                             |
| FED                                                          |                     |                                                                                   |                                          |                                             | 0.89                 | 0.86                                                                              | 0.81                                     | 0.74                                        |
| AI/IUI                                                       |                     |                                                                                   |                                          |                                             | 1.92**               | 1.62*                                                                             | 1.46                                     | 1.21                                        |
| ART w/autologous oocytes                                     |                     |                                                                                   |                                          |                                             | 2.40***              | 2.03***                                                                           | 1.55**                                   | 1.24                                        |
| ART w/donor oocytes                                          |                     |                                                                                   |                                          |                                             | 3.77**               | 2.12                                                                              | 1.63                                     | 0.98                                        |
| Chronic renal disease                                        |                     | 2.41***                                                                           | 2.42***                                  | 2.19***                                     |                      | 2.42***                                                                           | 2.42***                                  | 2.19***                                     |
| Heart disease                                                |                     | 2.77***                                                                           | 2.76***                                  | 2.46***                                     |                      | 2.78***                                                                           | 2.77***                                  | 2.47***                                     |
| Chronic hypertension                                         |                     | 1.20                                                                              | 1.19                                     | 0.95                                        |                      | 1.2                                                                               | 1.19                                     | 0.95                                        |
| Asthma                                                       |                     | 1.33**                                                                            | 1.33**                                   | 1.27*                                       |                      | 1.33**                                                                            | 1.33**                                   | 1.27*                                       |
| Insulin-dependent diabetes                                   |                     | 2.19***                                                                           | 2.18***                                  | 1.31                                        |                      | 2.20***                                                                           | 2.19***                                  | 1.31                                        |
| Mother's BMI pre-pregnancy (ref: healthy weight (18.5-24.9)) |                     |                                                                                   |                                          |                                             |                      |                                                                                   |                                          |                                             |
| underweight (<18.5)                                          |                     | 0.89                                                                              | 0.89                                     | 0.86                                        |                      | 0.89                                                                              | 0.89                                     | 0.87                                        |
| overweight (25-29.9)                                         |                     | 1.18**                                                                            | 1.18**                                   | 1.13*                                       |                      | 1.18**                                                                            | 1.18**                                   | 1.13*                                       |
| obese (30+)                                                  |                     | 1.39***                                                                           | 1.39***                                  | 1.26***                                     |                      | 1.41***                                                                           | 1.40***                                  | 1.26***                                     |
| unknown                                                      |                     | 2.30***                                                                           | 2.29***                                  | 1.94***                                     |                      | 2.31***                                                                           | 2.30***                                  | 1.94***                                     |
| Anxiety, depression or bipolar                               |                     | 1.08                                                                              | 1.08                                     | 0.99                                        |                      | 1.08                                                                              | 1.08                                     | 0.99                                        |
| Previous cesarian birth                                      |                     | 2.09***                                                                           | 2.10***                                  | 1.20*                                       |                      | 2.09***                                                                           | 2.10***                                  | 1.20*                                       |
| Smoking prior to pregnancy                                   |                     | 1.21                                                                              | 1.2                                      | 1.1                                         |                      | 1.21                                                                              | 1.2                                      | 1.11                                        |
| Maternal age (ref: 25-29)                                    |                     |                                                                                   |                                          |                                             |                      |                                                                                   |                                          |                                             |
| 15-24                                                        |                     | 0.91                                                                              | 0.91                                     | 0.98                                        |                      | 0.91                                                                              | 0.91                                     | 0.98                                        |
| 30-34                                                        |                     | 1.33***                                                                           | 1.32***                                  | 1.25***                                     |                      | 1.32***                                                                           | 1.31***                                  | 1.24***                                     |
| 35-39                                                        |                     | 1.77***                                                                           | 1.76***                                  | 1.53***                                     |                      | 1.74***                                                                           | 1.73***                                  | 1.52***                                     |
| 40+                                                          |                     | 2.34***                                                                           | 2.32***                                  | 1.83***                                     |                      | 2.23***                                                                           | 2.24***                                  | 1.80***                                     |
| Mother married at birth                                      |                     | 0.76***                                                                           | 0.76***                                  | 0.80***                                     |                      | 0.76***                                                                           | 0.76***                                  | 0.80***                                     |
| Mother has tertiary education                                |                     | 0.88*                                                                             | 0.88*                                    | 0.94                                        |                      | 0.87*                                                                             | 0.87*                                    | 0.93                                        |
| unknown                                                      |                     | 1.26                                                                              | 1.26                                     | 1.20                                        |                      | 1.26                                                                              | 1.25                                     | 1.20                                        |
| Hispanic origin                                              |                     | 1.04                                                                              | 1.05                                     | 1.05                                        |                      | 1.05                                                                              | 1.05                                     | 1.05                                        |
| unknown                                                      |                     | 0.81                                                                              | 0.80                                     | 0.80                                        |                      | 0.80                                                                              | 0.79                                     | 0.8                                         |
| First birth                                                  |                     | 1.74***                                                                           | 1.74***                                  | 1.45***                                     |                      | 1.72***                                                                           | 1.72***                                  | 1.44***                                     |
| Multifetal gestation                                         |                     |                                                                                   | 2.23***                                  | 0.84                                        |                      |                                                                                   | 2.09***                                  | 0.8                                         |
| Placenta previa                                              |                     |                                                                                   |                                          | 4.39***                                     |                      |                                                                                   |                                          | 4.36***                                     |
| HELLP syndrome                                               |                     |                                                                                   |                                          | 2.85***                                     |                      |                                                                                   |                                          | 2.86***                                     |
| Placental abruption                                          |                     |                                                                                   |                                          | 1.85***                                     |                      |                                                                                   |                                          | 1.85***                                     |
| Preterm delivery                                             |                     |                                                                                   |                                          | 3.39***                                     |                      |                                                                                   |                                          | 3.39***                                     |
| Pregnancy-induced hypertension                               |                     |                                                                                   |                                          | 1.02                                        |                      |                                                                                   |                                          | 1.02                                        |

|                           |          |          |          |          |          |          |          |          |
|---------------------------|----------|----------|----------|----------|----------|----------|----------|----------|
| Gestational diabetes      |          |          |          | 0.87     |          |          |          | 0.87     |
| Clinical chorioamnionitis |          |          |          | 1.52***  |          |          |          | 1.52***  |
| Cesarian birth            |          |          |          | 2.32***  |          |          |          | 2.31***  |
| Constant                  | 0.004*** | 0.003*** | 0.003*** | 0.002*** | 0.004*** | 0.003*** | 0.003*** | 0.002*** |
| N                         | 460976   | 460976   | 460976   | 460976   | 460976   | 460976   | 460976   | 460976   |

Note: MAR refers to all births where the neonate was conceived after any of the following procedures: Artificial insemination or intrauterine insemination (AI/IUI); Assisted reproductive technology (ART with autologous or donor eggs); or Fertility enhancing drugs (FED). SC stands for 'spontaneous conception'. \*\*\* P < 0.001, \*\*P < 0.01, \*P < 0.05

**Supplemental Table S5. Odds Ratios for non-transfusion maternal morbidity among women giving birth in Utah, 2009–2017, medically assisted reproduction compared with spontaneous conception (all births)**

|                                                             | MAR as one category   |                                                                                      |                                             |                                                | By type of treatment  |                                                                                      |                                             |                                                |
|-------------------------------------------------------------|-----------------------|--------------------------------------------------------------------------------------|---------------------------------------------|------------------------------------------------|-----------------------|--------------------------------------------------------------------------------------|---------------------------------------------|------------------------------------------------|
|                                                             | Model 1<br>(Baseline) | Model 2<br>(Maternal pre-existing comorbidities + socio-demographic characteristics) | Model 3<br>(Model 2 + multifetal gestation) | Model 4<br>(Model 3 + obstetric comorbidities) | Model 1<br>(Baseline) | Model 2<br>(Maternal pre-existing comorbidities + socio-demographic characteristics) | Model 3<br>(Model 2 + multifetal gestation) | Model 4<br>(Model 3 + obstetric comorbidities) |
| MAR (ref: SC)                                               | 1.44***               | 1.29**                                                                               | 1.12                                        | 0.96                                           |                       |                                                                                      |                                             |                                                |
| FED                                                         |                       |                                                                                      |                                             |                                                | 0.89                  | 0.86                                                                                 | 0.81                                        | 0.74                                           |
| AI/IUI                                                      |                       |                                                                                      |                                             |                                                | 1.92**                | 1.62*                                                                                | 1.46                                        | 1.21                                           |
| ART w/autologous oocytes                                    |                       |                                                                                      |                                             |                                                | 2.40***               | 2.03***                                                                              | 1.55**                                      | 1.24                                           |
| ART w/donor oocytes                                         |                       |                                                                                      |                                             |                                                | 3.77**                | 2.12                                                                                 | 1.63                                        | 0.98                                           |
| Chronic renal disease                                       |                       | 2.41***                                                                              | 2.42***                                     | 2.19***                                        |                       | 2.42***                                                                              | 2.42***                                     | 2.19***                                        |
| Heart disease                                               |                       | 2.77***                                                                              | 2.76***                                     | 2.46***                                        |                       | 2.78***                                                                              | 2.77***                                     | 2.47***                                        |
| Chronic hypertension                                        |                       | 1.20                                                                                 | 1.19                                        | 0.95                                           |                       | 1.2                                                                                  | 1.19                                        | 0.95                                           |
| Asthma                                                      |                       | 1.33**                                                                               | 1.33**                                      | 1.27*                                          |                       | 1.33**                                                                               | 1.33**                                      | 1.27*                                          |
| Insulin-dependent diabetes                                  |                       | 2.19***                                                                              | 2.18***                                     | 1.31                                           |                       | 2.20***                                                                              | 2.19***                                     | 1.31                                           |
| Mother's BMI pre-pregnancy (ref: healthy weight (18.5-24.9) |                       |                                                                                      |                                             |                                                |                       |                                                                                      |                                             |                                                |
| underweight (<18.5)                                         |                       | 0.89                                                                                 | 0.89                                        | 0.86                                           |                       | 0.89                                                                                 | 0.89                                        | 0.87                                           |
| overweight (25-29.9)                                        |                       | 1.18**                                                                               | 1.18**                                      | 1.13*                                          |                       | 1.18**                                                                               | 1.18**                                      | 1.13*                                          |
| obese (30+)                                                 |                       | 1.39***                                                                              | 1.39***                                     | 1.26***                                        |                       | 1.41***                                                                              | 1.40***                                     | 1.26***                                        |
| unknown                                                     |                       | 2.30***                                                                              | 2.29***                                     | 1.94***                                        |                       | 2.31***                                                                              | 2.30***                                     | 1.94***                                        |
| Anxiety, depression or bipolar                              |                       | 1.08                                                                                 | 1.08                                        | 0.99                                           |                       | 1.08                                                                                 | 1.08                                        | 0.99                                           |
| Previous cesarian birth                                     |                       | 2.09***                                                                              | 2.10***                                     | 1.20*                                          |                       | 2.09***                                                                              | 2.10***                                     | 1.20*                                          |
| Smoking prior to pregnancy                                  |                       | 1.21                                                                                 | 1.2                                         | 1.1                                            |                       | 1.21                                                                                 | 1.2                                         | 1.11                                           |
| Maternal age (ref: 25-29)                                   |                       |                                                                                      |                                             |                                                |                       |                                                                                      |                                             |                                                |
| 15-24                                                       |                       | 0.91                                                                                 | 0.91                                        | 0.98                                           |                       | 0.91                                                                                 | 0.91                                        | 0.98                                           |
| 30-34                                                       |                       | 1.33***                                                                              | 1.32***                                     | 1.25***                                        |                       | 1.32***                                                                              | 1.31***                                     | 1.24***                                        |
| 35-39                                                       |                       | 1.77***                                                                              | 1.76***                                     | 1.53***                                        |                       | 1.74***                                                                              | 1.73***                                     | 1.52***                                        |
| 40+                                                         |                       | 2.34***                                                                              | 2.32***                                     | 1.83***                                        |                       | 2.23***                                                                              | 2.24***                                     | 1.80***                                        |
| Mother married at birth                                     |                       | 0.76***                                                                              | 0.76***                                     | 0.80***                                        |                       | 0.76***                                                                              | 0.76***                                     | 0.80***                                        |
| Mother has tertiary education                               |                       | 0.88*                                                                                | 0.88*                                       | 0.94                                           |                       | 0.87*                                                                                | 0.87*                                       | 0.93                                           |
| unknown                                                     |                       | 1.26                                                                                 | 1.26                                        | 1.20                                           |                       | 1.26                                                                                 | 1.25                                        | 1.20                                           |
| Hispanic origin                                             |                       | 1.04                                                                                 | 1.05                                        | 1.05                                           |                       | 1.05                                                                                 | 1.05                                        | 1.05                                           |
| unknown                                                     |                       | 0.81                                                                                 | 0.80                                        | 0.80                                           |                       | 0.80                                                                                 | 0.79                                        | 0.8                                            |
| First birth                                                 |                       | 1.74***                                                                              | 1.74***                                     | 1.45***                                        |                       | 1.72***                                                                              | 1.72***                                     | 1.44***                                        |
| Multifetal gestation                                        |                       |                                                                                      | 2.23***                                     | 0.84                                           |                       |                                                                                      | 2.09***                                     | 0.8                                            |
| Placenta previa                                             |                       |                                                                                      |                                             | 4.39***                                        |                       |                                                                                      |                                             | 4.36***                                        |
| HELLP syndrome                                              |                       |                                                                                      |                                             | 2.85***                                        |                       |                                                                                      |                                             | 2.86***                                        |
| Placental abruption                                         |                       |                                                                                      |                                             | 1.85***                                        |                       |                                                                                      |                                             | 1.85***                                        |
| Preterm delivery                                            |                       |                                                                                      |                                             | 3.39***                                        |                       |                                                                                      |                                             | 3.39***                                        |
| Pregnancy-induced hypertension                              |                       |                                                                                      |                                             | 1.02                                           |                       |                                                                                      |                                             | 1.02                                           |
| Gestational diabetes                                        |                       |                                                                                      |                                             | 0.87                                           |                       |                                                                                      |                                             | 0.87                                           |

|                           |          |          |          |          |          |          |          |          |
|---------------------------|----------|----------|----------|----------|----------|----------|----------|----------|
| Clinical chorioamnionitis |          |          |          | 1.52***  |          |          |          | 1.52***  |
| Cesarian birth            |          |          |          | 2.32***  |          |          |          | 2.31***  |
| Constant                  | 0.004*** | 0.003*** | 0.003*** | 0.002*** | 0.004*** | 0.003*** | 0.003*** | 0.002*** |
| N                         | 460976   | 460976   | 460976   | 460976   | 460976   | 460976   | 460976   | 460976   |

Note: MAR refers to all births where the neonate was conceived after any of the following procedures: Artificial insemination or intrauterine insemination (AI/IUI); Assisted reproductive technology (ART with autologous or donor eggs); or Fertility enhancing drugs (FED). SC stands for 'spontaneous conception'. \*\*\* P < 0.001, \*\*P < 0.01, \*P < 0.05
